# Supplementary material
Source: PubMed Central journal article supplement (PMC384753)

**A**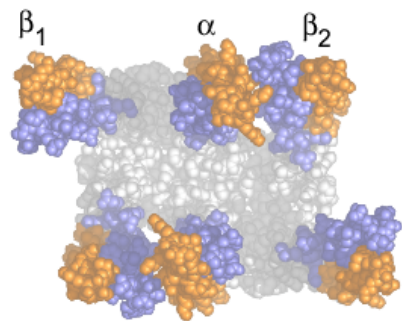

top view of cavity

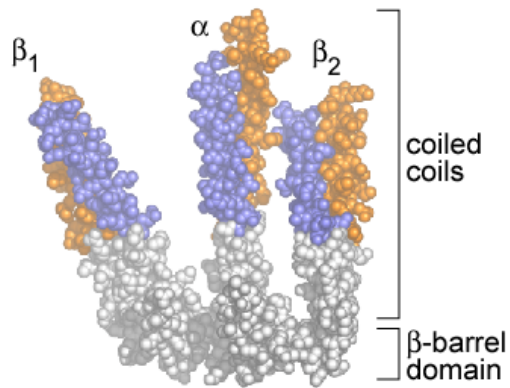

inside view

**B**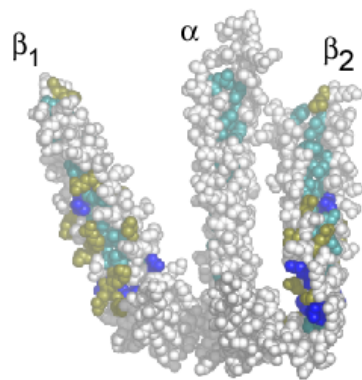

inside view

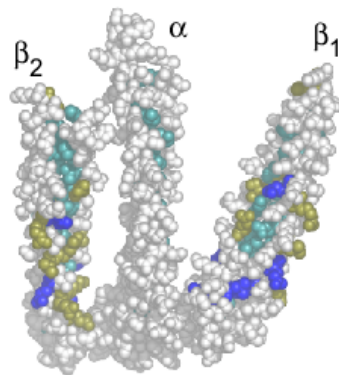

outside view

Supplement: pnas_101_13_4367__7.pdf [file pnas_101_13_4367__7.pdf]
